# Supplementary material for: Deformation mechanisms in mafic amphibolites and granulites: record from the Semail metamorphic sole during subduction infancy
Source: Copernicus journal article supplement (doi:10.5194/se-10-1733-2019), 2019-10-23
Supplement: Supplementary file 1 [file se-10-1733-2019-supplement.zip]

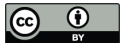

## *Supplement of*

# **Deformation mechanisms in mafic amphibolites and granulites: record from the Semail metamorphic sole during subduction infancy**

**Mathieu Soret et al.**

*Correspondence to:* Mathieu Soret ([math.soret@gmail.com](mailto:math.soret@gmail.com))

- [se-10-1733-2019-supplement-title-page.pdf](#)
- [Supp-Mat-EBSD\\_SE\\_resubmission1](#)
  - [FigS1\\_Phase-Map.pdf](#)
  - [FigS2\\_SPO\\_AR.pdf](#)
  - [FigS3\\_Plg\\_CPO\\_V2.pdf](#)
  - [FigS4\\_Amp-Cpx\\_CPO.pdf](#)
  - [FigS5\\_IPF\\_Amp\\_V3-01.png](#)

The copyright of individual parts of the supplement might differ from the CC BY 4.0 License.
