# Supplementary figures and images for: Deformation mechanisms in mafic amphibolites and granulites: record from the Semail metamorphic sole during subduction infancy
Source: Copernicus journal article supplement (doi:10.5194/se-10-1733-2019), 2019-10-23

SE13-123k

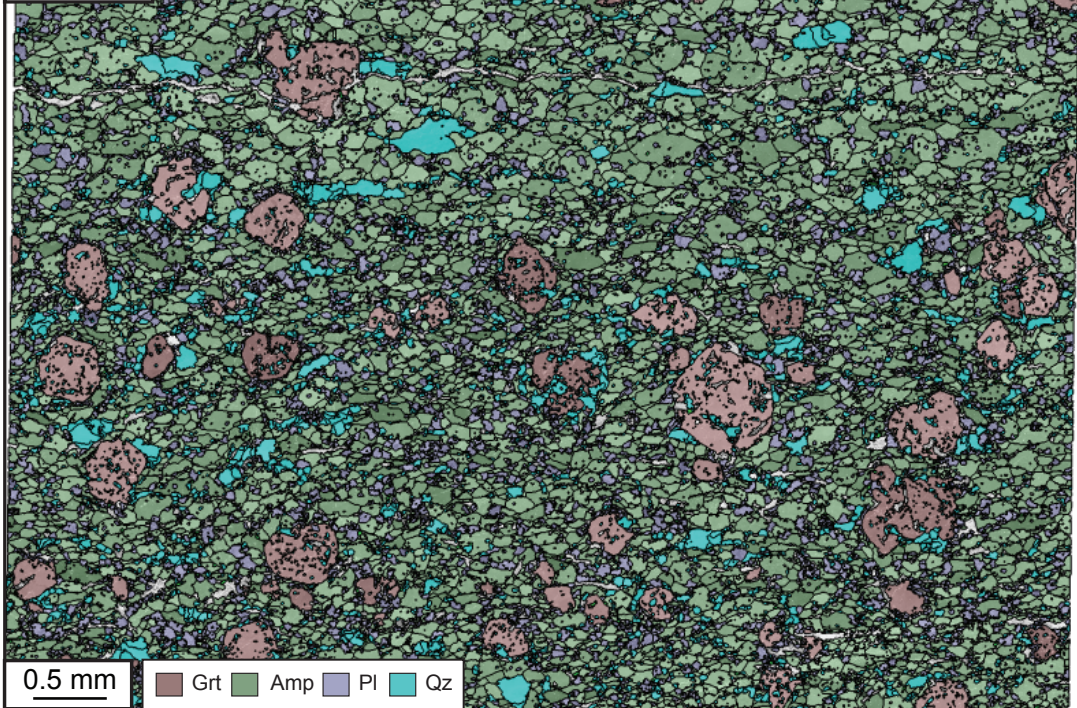

SE13-123a

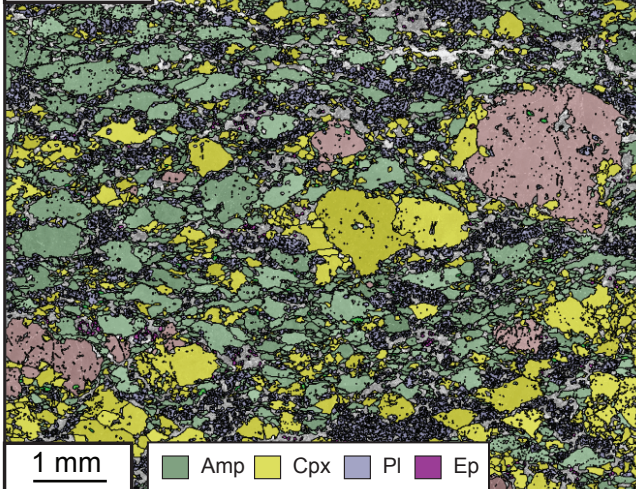

SE13-57

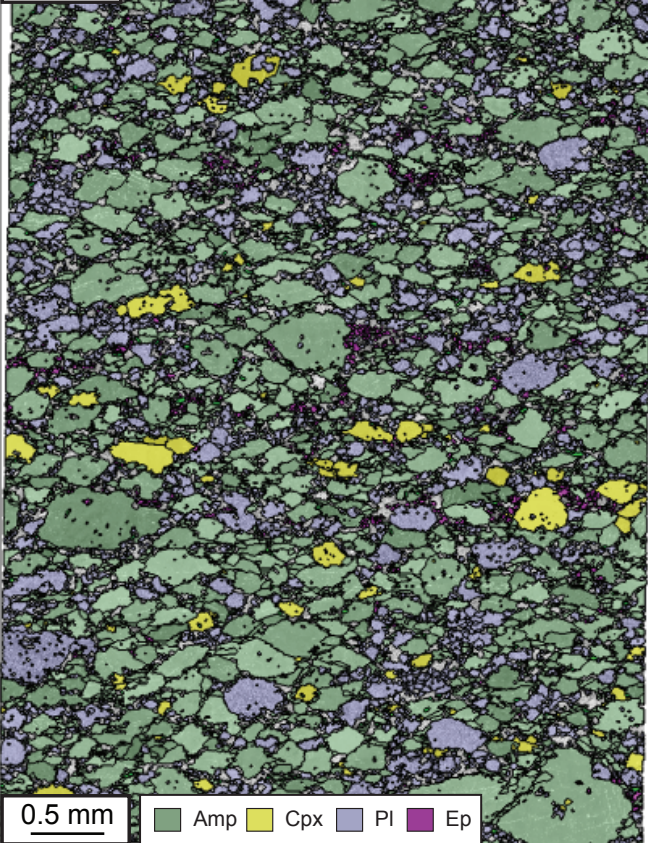

Supplement: Supplementary file 2 [file se-10-1733-2019-supplement.zip]

SE13-56

a

[100]

(010)

(001)

[4m]

n: 2747

max: 2.11

max: 2.11

max: 1.97

SE13-123a

[2m]

n: 1548

max: 2.59

max: 1.84

max: 1.91

SE13-123k

[40m]

n: 4192

max: 1.87

max: 1.34

max: 1.96

Pole figures for plagioclase

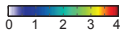

b

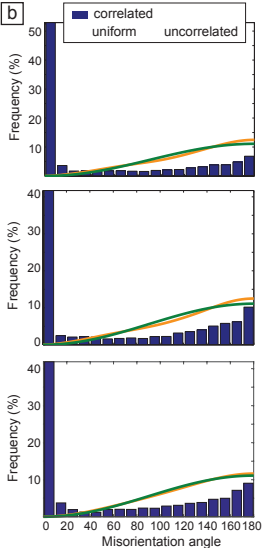

c [2-10°] Mis. axes

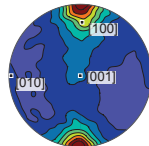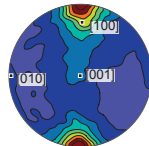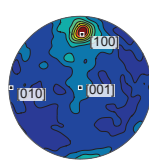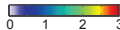

Supplement: Supplementary file 3 [file se-10-1733-2019-supplement.zip]

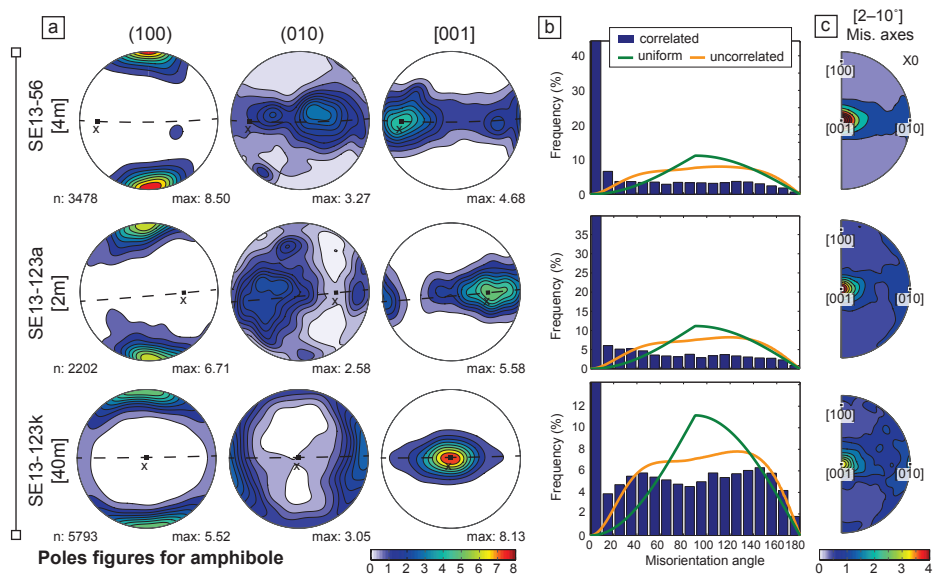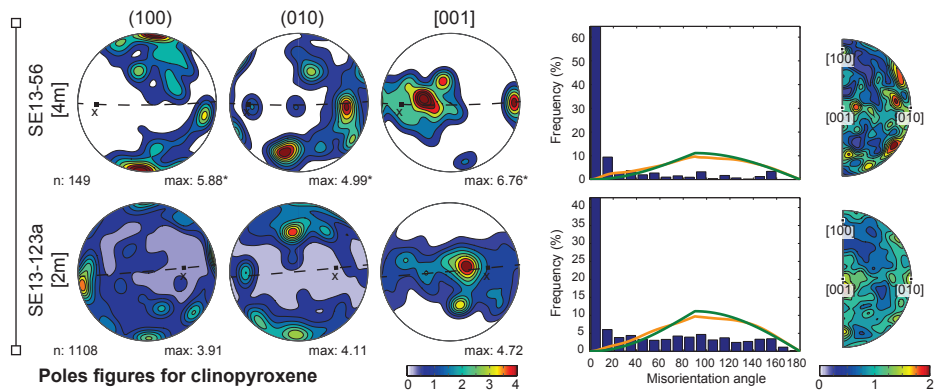

Supplement: Supplementary file 4 [file se-10-1733-2019-supplement.zip]

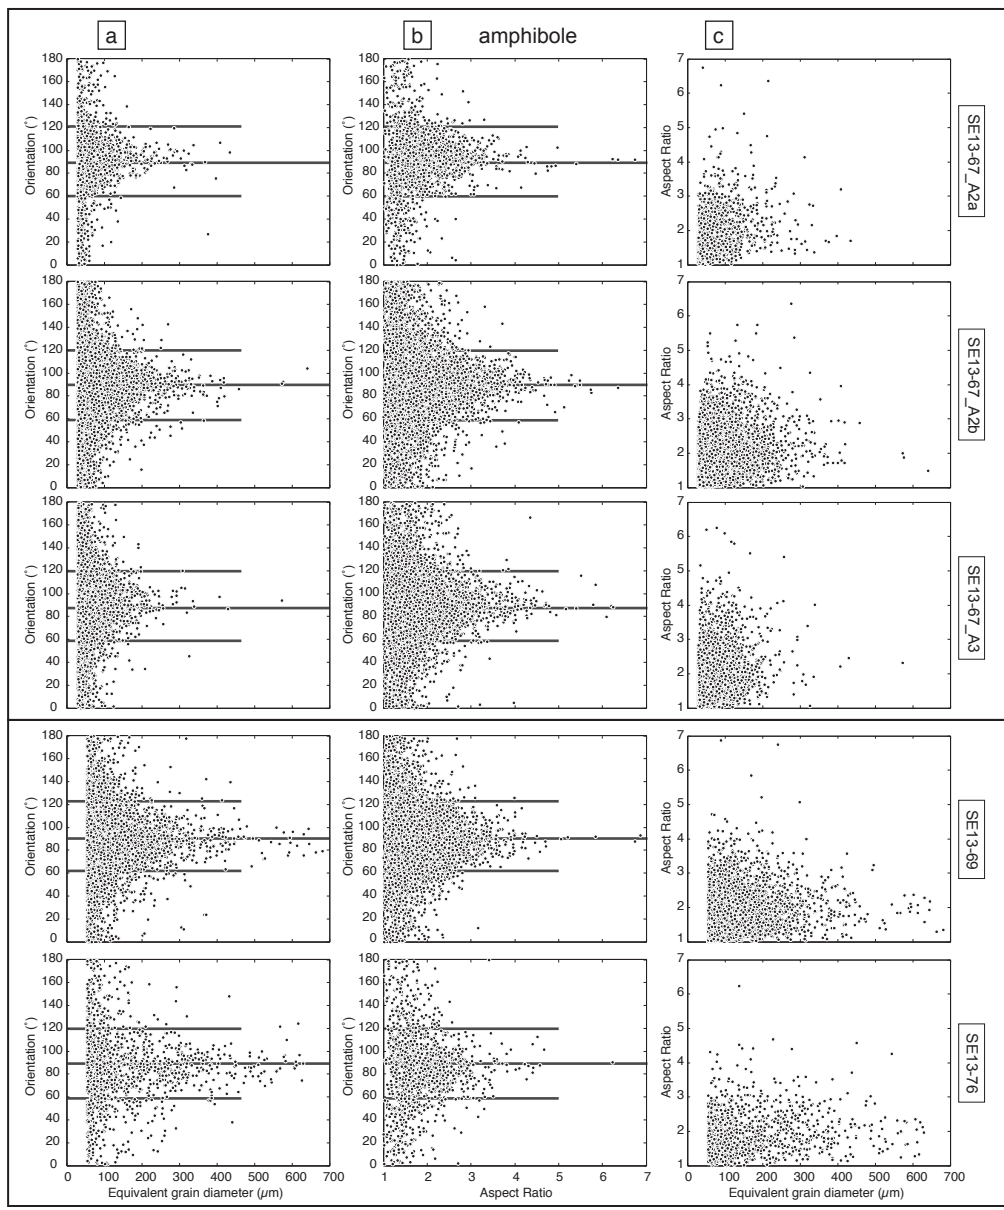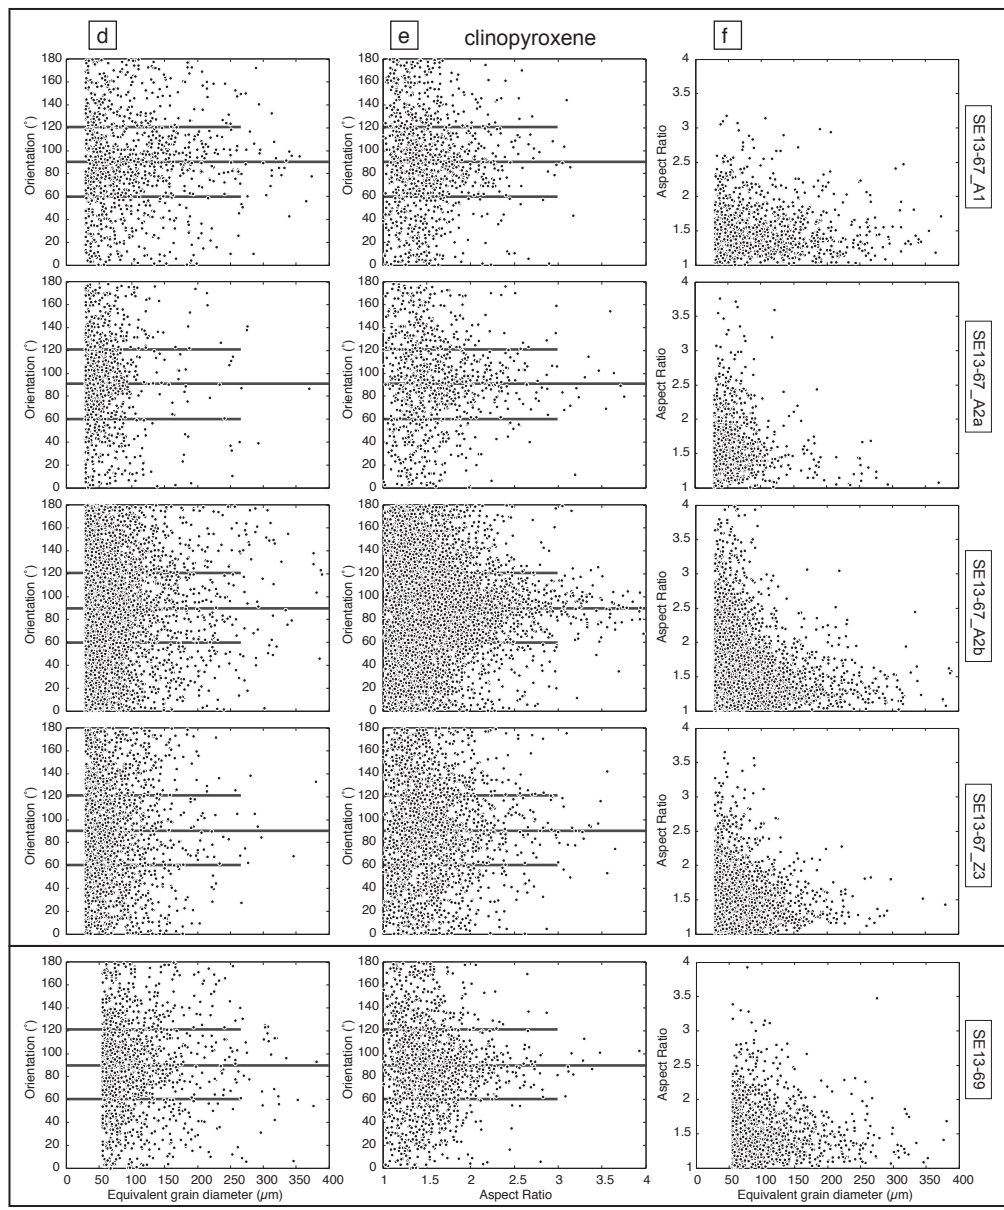

Supplement: Supplementary file 5 [file se-10-1733-2019-supplement.zip]
